# Supplementary material for: High CTSL2 expression predicts poor prognosis in patients with lung adenocarcinoma
Source: publisher site journal article supplement (doi:10.18632/aging.203540), 2021-09-23
Supplement: Supplementary file [file aging-v13i18-203540-supplementary-material-SD1.pdf]

**SUPPLEMENTARY FIGURE**

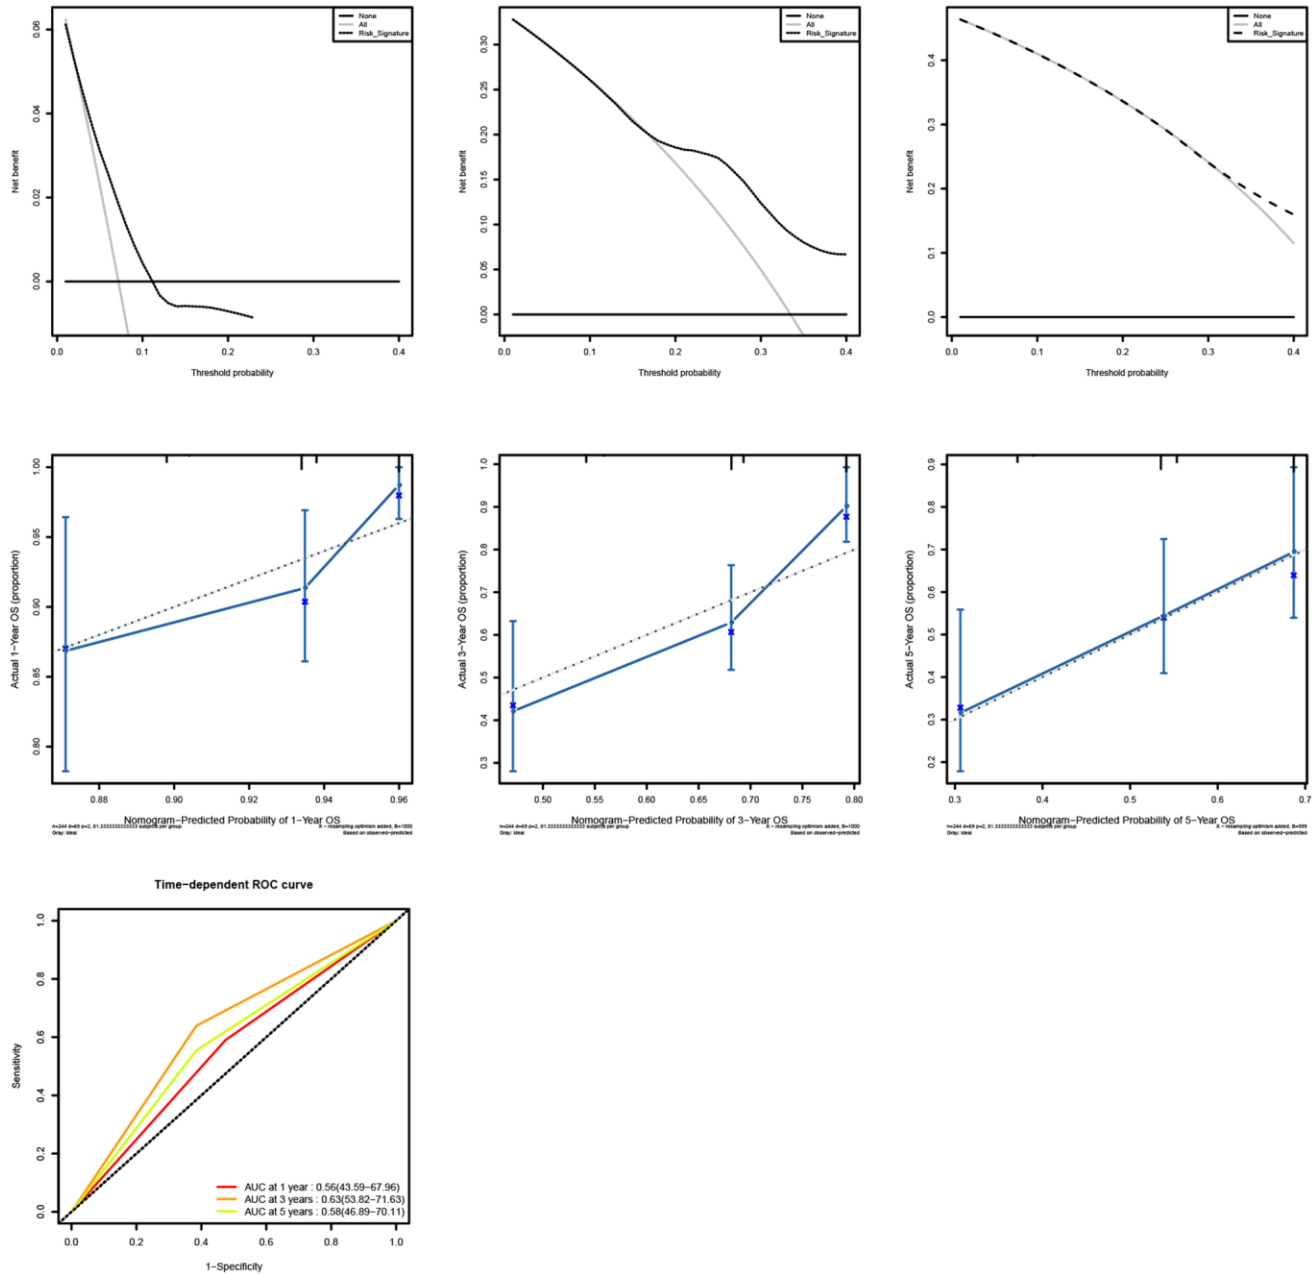

**Supplementary Figure 1. Evaluation of the discrimination and performance of the nomogram model. DCA (top panel), calibration plots (middle panel) and ROC (bottom panel) of the nomogram for the probability of OS at 1, 3 and 5 years.**
